# Supplementary material for: Non-syndromic and Syndromic Defects in Children with Extracranial Germ Cell Tumors (eGCT): Data of 2,610 Children Registered with the German MAKEI 96/MAHO 98 Registry Compared to the General Population
Source: Preprints.org preprint supplement (doi:10.20944/preprints202404.1550.v1), 2024-04-23
Supplement: Supplementary file 3 [file supplementary]

Supplementary file 1. Odds ratio and 95% confidence intervals for eGCT in patients with syndromes
